# Supplementary material
Source: PubMed Central journal article supplement (PMC2486412)
Supplement: NIHMS44558-supplement-supp.pdf [file NIHMS44558-supplement-supp.pdf]

Supplementary data: Figure-1

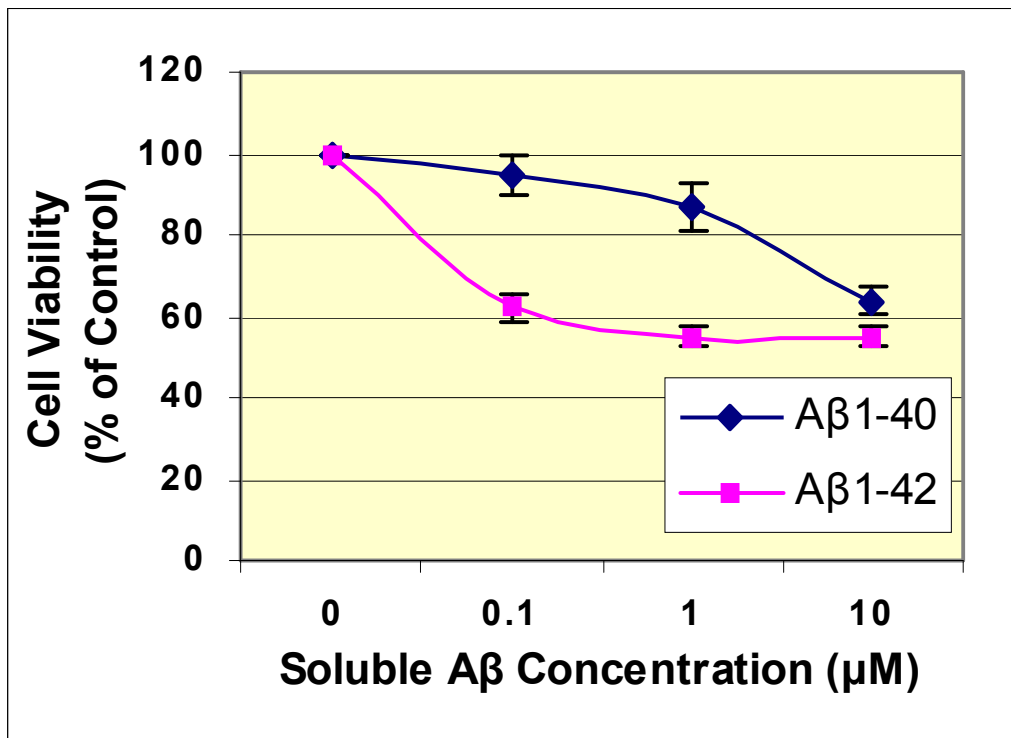

**Cytotoxicity of A $\beta$ 1-40 and A $\beta$ 1-42 in mice primary neuronal cells:** Mice primary cortical neuronal cells were exposed to various concentrations (0.0/0.1/1.0/10.0  $\mu$ M) of soluble (non-aggregated) A $\beta$ 1-40 or A $\beta$ 1-42 obtained from commercial source (American peptide company, Sunnyvale, CA). After 48 hours of exposure, cell viability was tested by MTT assay using Promega (Madison, WI) kit. Results revealed that both the peptides were toxic to the cells even at lower concentrations and A $\beta$ 1-42 was more cytotoxic than A $\beta$ 1-40. Data shown were Mean  $\pm$  S.E. derived from 3-4 independent observations.

Supplementary data: Table 1

| Gene ID | Description                                              | Fold increase (Pb/Control) | CpG rich |
|---------|----------------------------------------------------------|----------------------------|----------|
| U77942  | Syntaxin 7 (STX7)                                        | 2.672                      | No       |
| J04046  | Calmodulin                                               | 1.867                      | Yes      |
| D21243  | Heme oxygenase 2 (HO2)                                   | 1.822                      | Yes      |
| D30648  | Flavoprotein subunit of complex II;                      | 1.775                      | Yes      |
| M22430  | Membrane-associated phospholipase A2 precursor           | 1.742                      | Yes      |
| D78579  | Neuron-derived orphan receptor 1 (NOR1)                  | 1.584                      | Yes      |
| M28215  | ras-related protein RAB5A                                | -1.558                     | Yes      |
| D63475  | Clathrin coat assembly protein AP50                      | -1.567                     | Yes      |
| U71127  | ras-related protein RAB-32                               | -1.634                     | Yes      |
| X69550  | rho GDP dissociation inhibitor 1 (RHO-GDI 1)             | -1.653                     | Yes      |
| U18420  | ras-related protein RAB-5C                               | -1.739                     | Yes      |
| M36430  | Guanine nucleotide-binding protein beta subunit 1 (GNB1) | -1.976                     | Yes      |
| D13988  | RAB GDP dissociation inhibitor beta (RAB GDI beta)       | -2.062                     | Yes      |
| L36983  | dynamamin 2                                              | -2.326                     | Yes      |
| L33075  | ras GTPase-activating-like protein IQGAP1; p19; KIAA0051 | -2.404                     | Yes      |
| U07364  | Inward rectifier potassium channel 4                     | -2.427                     | Yes      |
| X85030  | Calpain p94 large (catalytic) subunit                    | -2.558                     | Yes      |
| L25119  | mu-type opioid receptor (MOR-1)                          | -2.786                     | Yes      |
| D21260  | Clathrin heavy subunit 1 (CLH-17); KIAA0034              | -2.915                     | Yes      |
| U07882  | delta-type opioid receptor (DOR-1)                       | -3.861                     | Yes      |
| D10995  | 5-hydroxytryptamine 1B receptor (5-HT-1B)                | -3.968                     | Yes      |
| X55758  | D1A dopamine receptor (DRD1A)                            | -4.167                     | No       |

**Microarray screening of neurobiology related genes:** Microarray array analysis of about 588 neurobiology-related human genes was conducted to identify the genes that are altered due to infantile exposure to Pb in the frontal association cortex of 23-year old cynomolgus monkeys. The results showed that the expression profile of only a few genes (22) was changed due to early life exposure to Pb. Most of the altered genes belonged to neurotransmitter, growth receptors and signal transduction pathways. We further conducted searches on various databases (Ensembl and NCBI nucleotides) to determine if the regulatory regions of these genes were rich in CpG dinucleotides (>60%). We found that most of these altered genes (with the exception of two) were abundant in CpG dinucleotides in their 5'untranslated regions (5'UTR). These findings provide the initial evidence for the association of epigenetic pathway to explain such latent effects; however, these studies require validation by high throughput methylation sequence profiling.
